# Supplementary material
Source: PubMed Central journal article supplement (PMC2575492)
Supplement: 0803815105_0803815105SI.pdf [file 0803815105_0803815105SI.pdf]

# Supporting Information

Gryllos *et al.* 10.1073/pnas.0803815105

## SI References

1. Alberti S, Ashbaugh CD, Wessels MR (1998) Structure of the *has* operon promoter and regulation of hyaluronic acid capsule expression in group A *Streptococcus*. *Mol Microbiol* 28:343–353.
2. Gryllos I, Levin JC, Wessels MR (2003) The CsrR/CsrS two-component system of group A *Streptococcus* responds to environmental Mg<sup>2+</sup>. *Proc Natl Acad Sci USA* 100:4227–4232.
3. Gryllos I, *et al.* (2007) Mg<sup>2+</sup> signalling defines the group A streptococcal CsrRS (CovRS) regulon. *Mol Microbiol* 65:671–683.
4. Beres SB, *et al.* (2002) Genome sequence of a serotype M3 strain of group A *Streptococcus*: Phage-encoded toxins, the high-virulence phenotype, and clone emergence. *Proc Natl Acad Sci USA* 99:10078–10083.
5. Ferretti JJ, *et al.* (2001) Complete genome sequence of an M1 strain of *Streptococcus pyogenes*. *Proc Natl Acad Sci USA* 98:4658–4663.

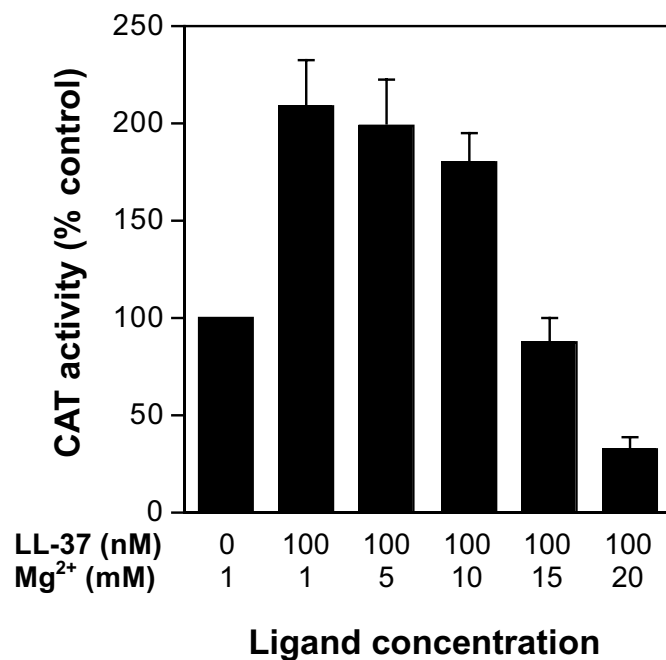

**Fig. S1.** Oposing effects of LL-37 and Mg<sup>2+</sup> on GAS capsule gene expression. Exposure of the GAS reporter strain 003CAT to increasing concentrations of Mg<sup>2+</sup> inhibited the stimulatory effect of LL-37 on *has* promoter activity. CAT activities from bacteria grown in the presence of supplemental MgCl<sub>2</sub> and/or LL-37 are shown as percentage of activity of that from control 003CAT cultures in unsupplemented medium (1 mM MgCl<sub>2</sub>). Results shown are means ± SD from at least 3 independent experiments.

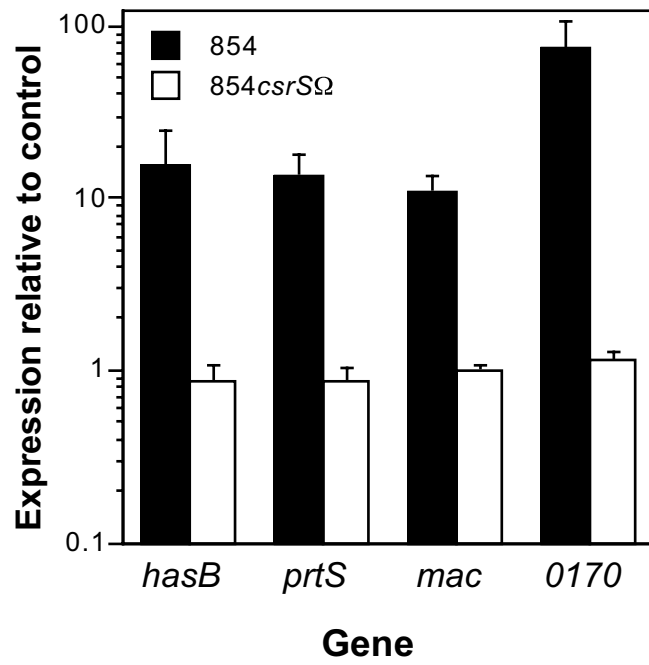

**Fig. S2.** LL-37-induced changes in CsrRS-regulated gene expression in wild-type GAS strain 854 and its isogenic *csrS* mutant 854*csrS*Ω. Data represent expression of *hasB*, *prtS*, *mac*, and *SPy0170* during growth in the presence of 100 nM LL-37 relative to that in control cultures of the same strain in unsupplemented medium. Data for strain 854 are the same as those in Fig. 3 and are shown here for comparison with those for strain 854*csrS*Ω. Results shown are means ± SD from at least 3 independent experiments.

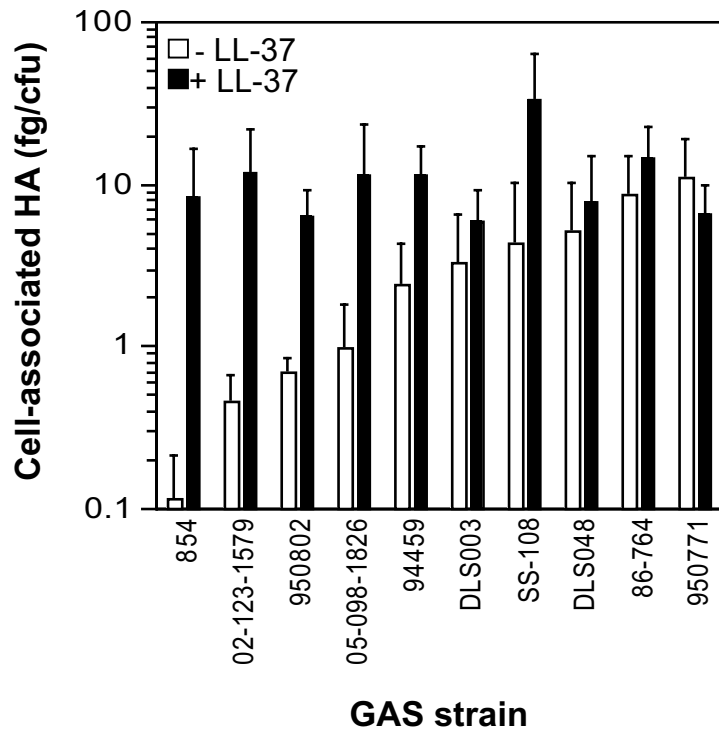

**Fig. S3.** Effect of LL-37 on HA capsule production in 10 wild-type GAS strains. Cell-associated HA was extracted from bacteria grown in the presence or absence of 100 nM LL-37. Note the marked increase in HA production in the presence of LL-37 for strains that express low amounts of capsule under standard growth conditions. Results shown are means  $\pm$  SD from at least 3 independent experiments.

**Table S1. AMPs tested for stimulation of *has* operon expression in GAS**

| Peptide | Description               | Amino acid sequence                         | pI   |
|---------|---------------------------|---------------------------------------------|------|
| LL-37   | Human cathelicidin        | LLGDFFRKSKEKIGKEFKRIVQRIKDFLRNLPRTES        | 10.6 |
| RL-37   | Rhesus cathelicidin       | RLGNFFRKVKEKIGGGGLKKVQKIKDFLGNLVPTAS        | 11.2 |
| CRAMP   | Mouse cathelicidin        | GLLRKGGEKIGEKLLKIGQKIKNFFQKLVQPPEQ          | 10.2 |
| SMAP29  | Sheep cathelicidin        | RGLRRLGRKIAHGKVKYGPVLRIRIAG                 | 12.3 |
| HNP1    | Human $\alpha$ -defensin  | ACYCRIPACIAGERRYGTCTIYQGRWAFCC              | 8.7  |
| HNP3    | Human $\alpha$ -defensin  | DCYCRIPACIAGERRYGTCTIYQGRWAFCC              | 8.3  |
| HNP4    | Human $\alpha$ -defensin  | VCSCRLVFCRRELRVGNCLIGGVSTFYCCTRV            | 9.0  |
| HD5     | Human $\alpha$ -defensin  | ATCYCRHGRCATRESLSGVCEISGRLYRLCCR            | 9.0  |
| HD6     | Human $\alpha$ -defensin  | AFTCHCRRSCYSTEYSYGTCTVMGINHRFCL             | 8.4  |
| HBD1    | Human $\beta$ -defensin   | GLGHRSDHYNCVSSGGQCLYSACPIFTKIQTGTCYRGKAKCCK | 9.1  |
| HBD2    | Human $\beta$ -defensin   | GIGDPVTLCKSGAICHVPVFCPRRYKQIGTCGLPGTKCCKKP  | 9.3  |
| HBD3    | Human $\beta$ -defensin   | GIINTLQKYCRVRGGRCVLSCLPKEEQIGKCTRGRKCCRRKK  | 10.1 |
| RC-101  | $\theta$ -defensin analog | Cyclic [GICRC ICGKG ICRCI CGR]              | 9.0  |
| PG-1    | Porcine protegrin         | RGGRLCYCRRRFCVCVGR-NH <sub>2</sub>          | 10.7 |

**Table S2. GAS strains used in this study**

| Strain                                | M type  | Clinical syndrome       | Source                                                 |
|---------------------------------------|---------|-------------------------|--------------------------------------------------------|
| 854                                   | 1       | Retroperitoneal abscess | Brigham and Women's Hospital                           |
| 854 <i>csrS</i> Ω                     | 1       | N/A                     | This study                                             |
| DLS048                                | 1       | Necrotizing fasciitis   | D. Stevens, University of Washington                   |
| DLS003                                | 3       | Necrotizing fasciitis   | D. Stevens, University of Washington                   |
| 003CAT                                | 3       | N/A                     | 1                                                      |
| 003 <i>csrS</i> Ω                     | 3       | N/A                     | 2                                                      |
| 003 <i>csrS</i> Ω(pORI23)             | 3       | N/A                     | 3                                                      |
| 003 <i>csrS</i> Ω(pORI- <i>csrS</i> ) | 3       | N/A                     | 3                                                      |
| 86-764                                | 3       | Rheumatic fever         | E. Kaplan, University of Minnesota                     |
| 950771                                | 3       | Necrotizing fasciitis   | E. Kaplan, University of Minnesota                     |
| 950802                                | 3       | Necrotizing fasciitis   | E. Kaplan, University of Minnesota                     |
| 94459                                 | 4       | Necrotizing fasciitis   | E. Kaplan, University of Minnesota                     |
| 02-123-1579                           | 5       | Bacteremia              | Children's Hospital Boston                             |
| SS-108                                | 29      | Unknown                 | R. Facklam, Centers for Disease Control and Prevention |
| 05-098-1826                           | Unknown | Pharyngitis             | Children's Hospital Boston                             |

**Table S3. Oligonucleotide primers used in this study**

| Primer*                           | Sequence (5'–3')       | Position† | Source                                     |
|-----------------------------------|------------------------|-----------|--------------------------------------------|
| qRT-PCR                           |                        |           |                                            |
| rt0132-F ( <i>SPy0170</i> )       | ttatgatcgcaactgctgctg  | 23–43     | 3                                          |
| rt0132-R                          | tcaggagcattttgtccgtag  | 128–108   | 3                                          |
| rt0132-R4‡                        | ggaccagtgtgccgtagaaa   | 137–117   | This study                                 |
| rt0298-F ( <i>prrS</i> )          | cgcgtagccttaaaacagc    | 4447–4466 | 3                                          |
| rt0298-R                          | aggcaggctgacaacaactc   | 4566–4546 | 3                                          |
| rt0583-F ( <i>mac</i> )           | ccacagcaggaatatgcttca  | 290–311   | 3                                          |
| rt0583-R                          | caaacatctgttcgcttgg    | 406–387   | 3                                          |
| rt0583-F3 ( <i>mac</i> )§         | gctaactgacgcataacca    | 756–785   | This study                                 |
| rt0583-R3                         | ccagcgggaattaacaccaac  | 911–892   | This study                                 |
| rt1800-F ( <i>recA</i> )          | tgattctggtgctggttgatc  | 282–301   | 3                                          |
| rt1800-R                          | atttacgcatggcctgactc   | 415–396   | 3                                          |
| rt1852-F ( <i>hasB</i> )          | tccccaaacgctaattgaag   | 825–844   | 3                                          |
| rt1852-R                          | ttaaacggtaaaccccgact   | 952–933   | 3                                          |
| rt- <i>emm3</i> -F ( <i>emm</i> ) | gctttagaagaagcaaacagca | 1327–1348 | This study                                 |
| rt- <i>emm3</i> -R                | tcagggattgtgagtctgat   | 1535–1515 | This study                                 |
| <i>emm</i> typing                 |                        |           |                                            |
| <i>emm1</i>                       | tattcgttagaaaattaa     | 28–46     | Centers for Disease Control and Prevention |
| <i>emm2</i>                       | gcaagttcttcagctgttt    | 1493–1474 | Centers for Disease Control and Prevention |

\*Numbers for qRT-PCR primers indicate M-type 3 strain MGAS315 (4) or M-type 1 strain SF370 ORFs (5). F, forward; R, reverse.

†Nucleotide position relative to the start codon of ORFs on M-type 3 strain MGAS315 or M-type 1 strain SF370 chromosome.

‡Reverse primer specific to M-type 1 ORF SPy0170, used with primer rt0132-F for mRNA detection in M-type 1 strain 854.

§Primer pair rt0583-F3/rt0583-R3 used for *mac*-specific mRNA detection in strains 02-123-1579 (M5) and 5S-108 (M29).
